# Supplementary material
Source: PubMed Central journal article supplement (PMC3602780)
Supplement: mmc1.pdf [file mmc1.pdf]

# Unexpected Membrane Dynamics Unveiled by Membrane Nanotube Extrusion

Clément Campillo,<sup>†‡§¶\*</sup> Pierre Sens,<sup>¶</sup> Darius Köster,<sup>||</sup> Léa-Laetitia Pontani,<sup>††</sup> Daniel Lévy,<sup>†‡§</sup> Patricia Bassereau,<sup>†‡§</sup> Pierre Nassoy,<sup>†‡§ §§\*</sup> and Cécile Sykes<sup>†‡§\*</sup>

<sup>†</sup>Institut Curie, Centre de Recherche, Laboratoire Physico-Chimie, Paris, France; <sup>‡</sup>Centre National de la Recherche Scientifique, UMR168, Paris, France; <sup>§</sup>Université Paris 6, Paris, France; <sup>¶</sup>Laboratoire Gulliver, UMR 7083 Centre National de la Recherche Scientifique-École Supérieure de Physique et de Chimie Industrielles de la Ville de Paris, Paris, France; <sup>||</sup>National Centre for Biological Sciences, Tata Institute of Fundamental Research, University of Agricultural Sciences, Gandhi Krishi Vignana Kendra, Bangalore, India; <sup>††</sup>Department of Physics and Center for Soft Matter Research, New York University, New York, New York; <sup>§§</sup>Laboratoire Photonique, Numérique et Nanosciences (LP2N)- UMR5298 CNRS Institut d'Optique Graduate School, Université Bordeaux, Talence, France; and <sup>¶¶</sup>Institut Lumière Matière, UMR5306 Université Lyon 1-CNRS, Université de Lyon 69622 Villeurbanne Cedex, France.

Unexpected Membrane Dynamics

Campillo et al.

Submitted September 5, 2012, and accepted for publication January 8, 2013.

\*Correspondence: clement.campillo@univ-lyon1.fr; pierre.nassoy@curie.fr; cecile.sykes@curie.fr

## Supplementary Material

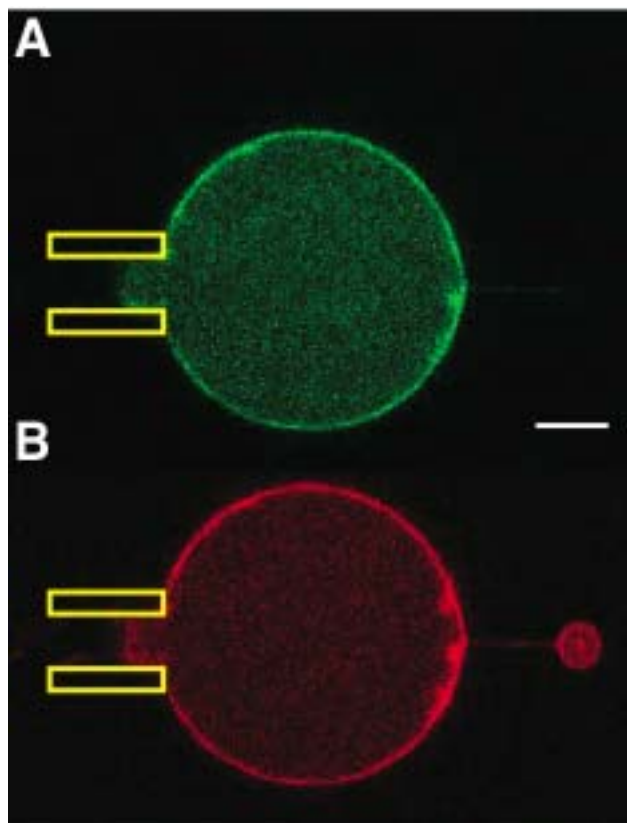

**Supplementary Fig. S1: Confocal observation of a nanotube extrusion experiment on a liposome containing a reconstituted actin cortex** A) Equatorial confocal video micrograph of the actin cortex localized at the liposome membrane B) Equatorial confocal video micrograph of the liposome membrane, the nanotube is easily visible with confocal microscopy (scale bar: 5  $\mu\text{m}$ ).

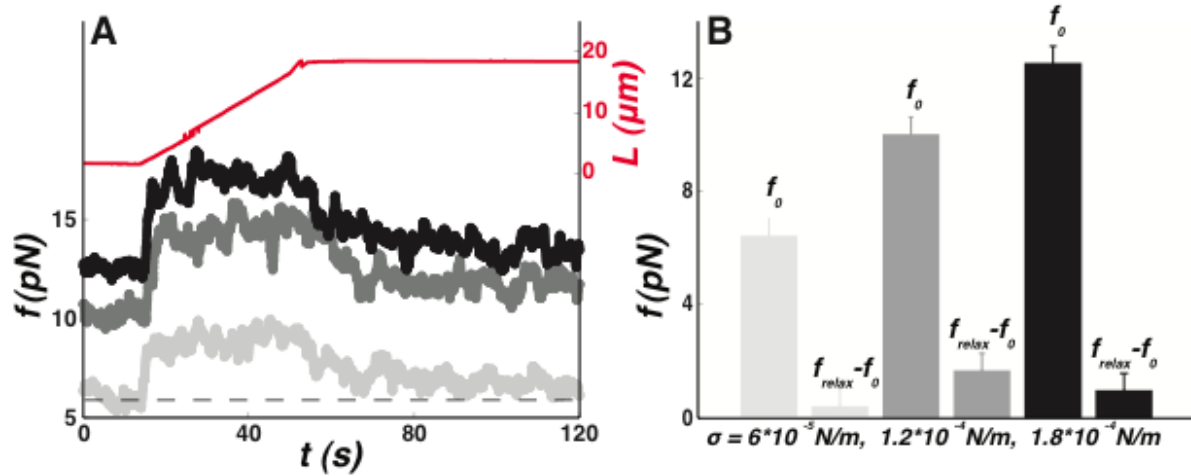

**Supplementary Fig. S2: The force used for the determination of bending moduli is close to  $f_0$  since  $f_{\text{relax}} - f_0 \ll f_0$  especially when tension increases:** A) force response to a modification of the tube length  $L$  (red plot) for a liposome with lipid composition EPC/DOGS-NTA-Ni/cholesterol 58:5:37 prepared by IE with increasing membrane tension (light grey:  $6 \times 10^{-5}$  N/m, dark grey:  $1.2 \times 10^{-4}$  N/m, black:  $1.8 \times 10^{-4}$  N/m) B)  $f_0$  and  $f_{\text{relax}} - f_0$  for the curves presented in A)
